# Supplementary material for: Flavonoids from Rosa roxburghii Tratt prevent reactive oxygen species-mediated DNA damage in thymus cells both combined with and without PARP-1 expression after exposure to radiation in vivo
Source: publisher site journal article supplement (doi:10.18632/aging.103688), 2020-08-24
Supplement: Supplementary file [file aging-v12i16-103688-supplementary-material-SD1.pdf]

**SUPPLEMENTARY FIGURES**

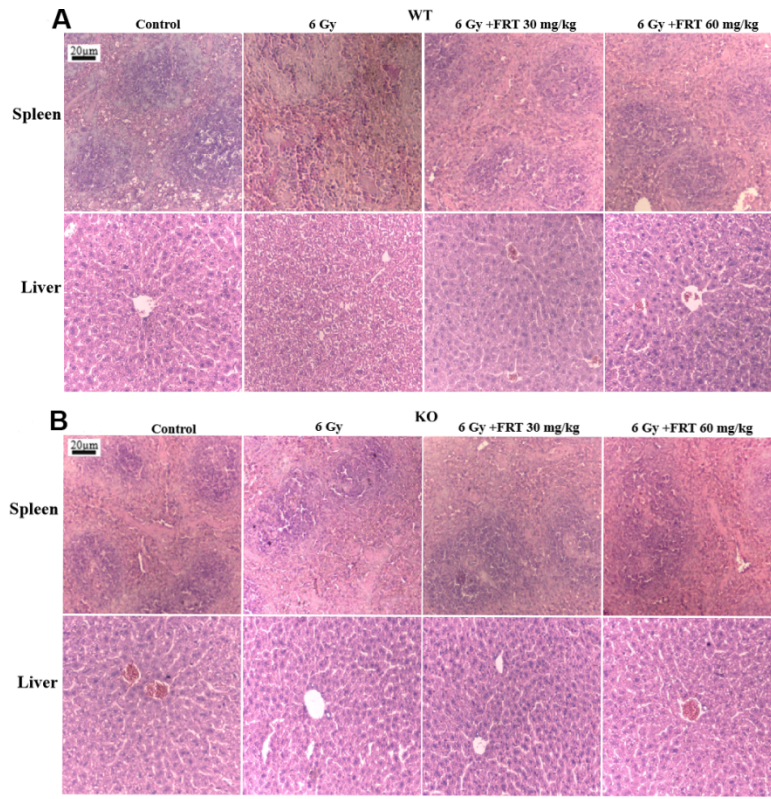

**Supplementary Figure 1. Radiation changed the morphology of liver/spleen tissue, but FRT reduced these changes. (A) and (B).** Sacrificed mouse spleens and livers 4 days after radiation were fixed in 4% paraformaldehyde for overnight, embedded in paraffin, sectioned and stained with HE, then imaged using light microscopy.

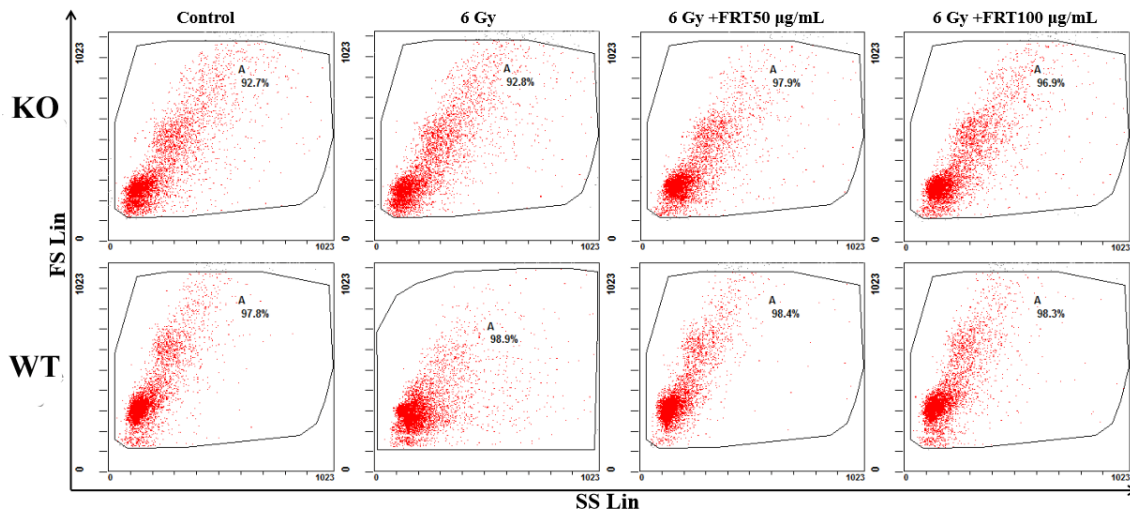

**Supplementary Figure 2. Effect of FRT on apoptosis of thymus cells after irradiation due to PARP-1.** Apoptosis was detected using an Annexin V-FITC labeled fluorescent probe with green fluorescence. Cells were treated with FRT 2 h before irradiation, then apoptosis was measured 6 h after irradiation.

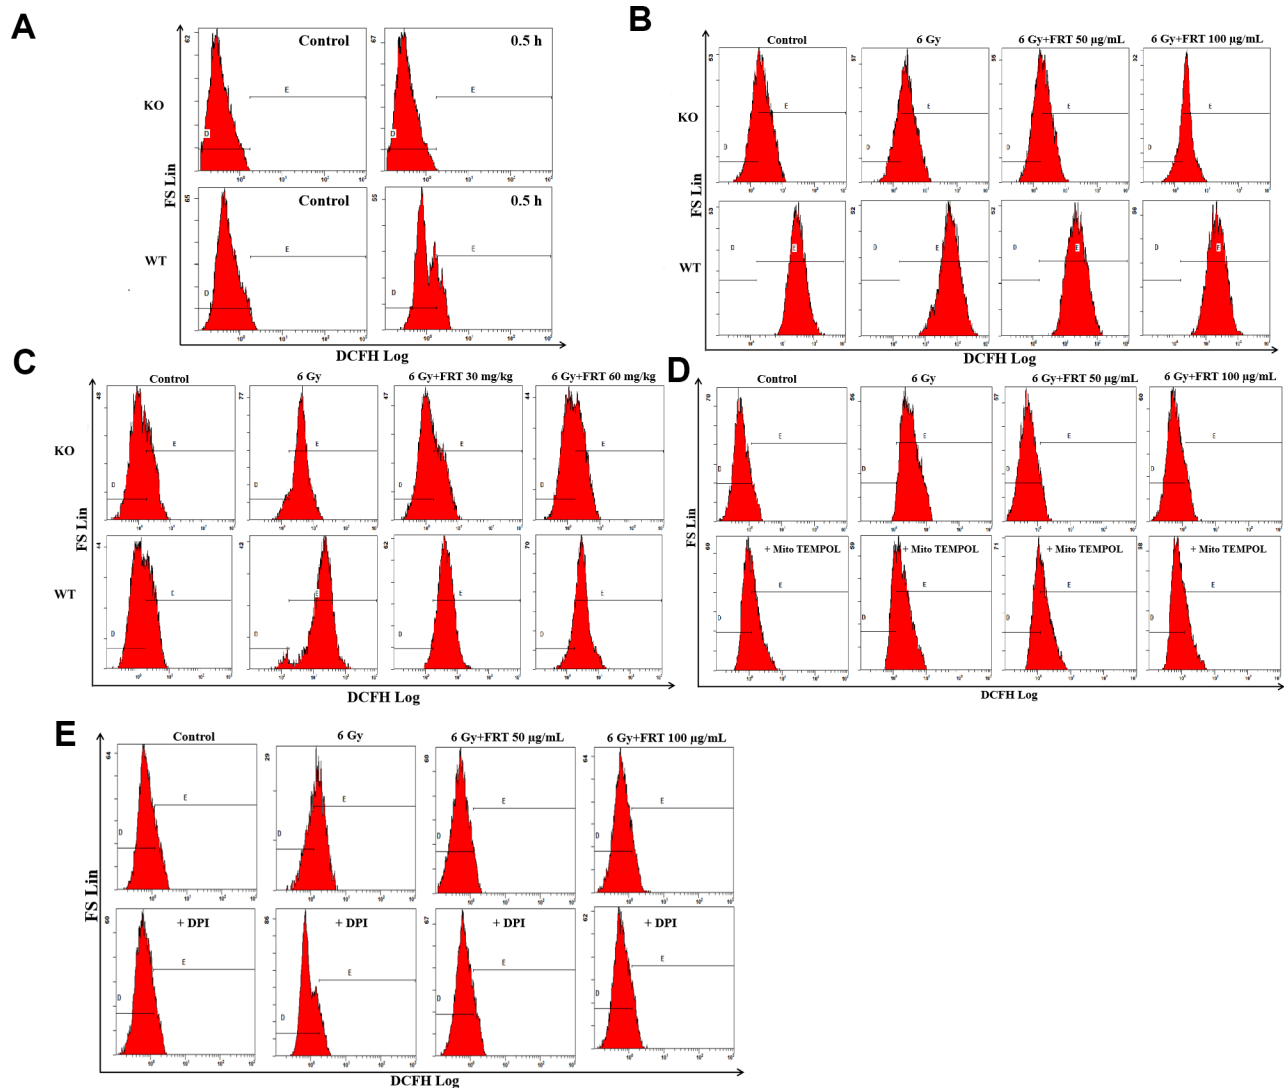

**Supplementary Figure 3. Effect of FRT on intracellular ROS scavenging.** (A) Thymus cell suspensions from WT and KO mice were divided into normal and radiation groups. Thymus cells were harvested 0.5 h after radiation, and levels of reactive oxygen species detected. (B). Thymus cell suspensions were divided into four groups: Control, radiation (6 Gy), radiation+FRT 50 µg/mL and radiation+FRT 100 µg/mL groups. After incubation of cells with FRT for 2 hours, thymus cells in the experimental group were given a one-time X-ray radiation of 6 Gy. ROS levels in cells loaded with probes were measured by flow cytometry. (C). Thymus cells from WT and KO mice were divided into 4 groups: control, radiation (6 Gy), radiation + FRT 30 mg/kg and radiation + FRT 60 mg/kg groups. Mice in the drug group were administered FRT for 4 days. Mice were exposed to a one-time X-ray radiation dose of 6 Gy. ROS levels in the thymus cells loaded with probes were measured by flow cytometry. (D) Thymus cells treated with MitoTEMPOL (50 µM, an anti-oxidant targeting mitochondria) after FRT treatment for 1 h. Cells were exposed to 6 Gy after another 1 h incubation, then ROS levels were detected by flow cytometry 0.5 h after irradiation. (E). Thymus cells were treated with DPI (10 µM, an inhibitor of NADPH oxidase) after FRT treatment for 1 h, Cells were exposed to 6 Gy after another 1 h incubation, then ROS levels were detected by flow cytometry 0.5 h after irradiation.

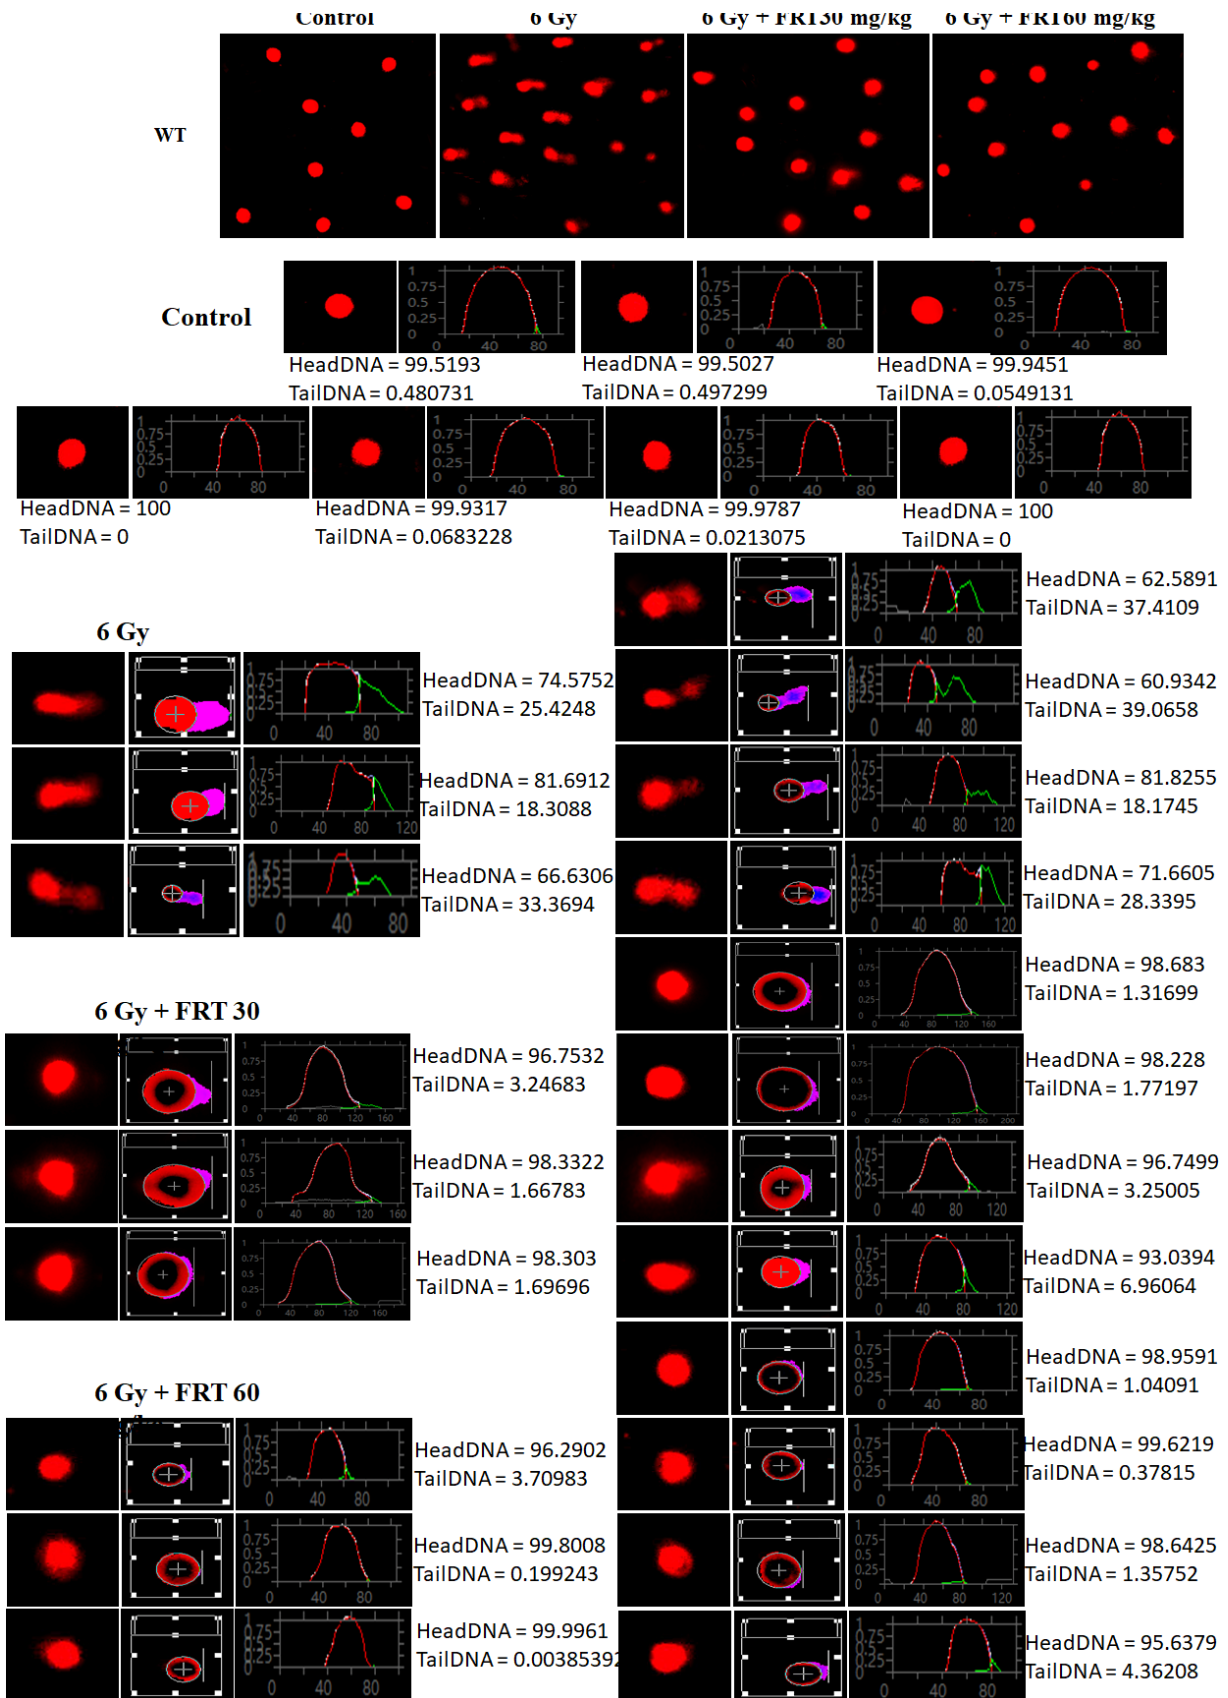

Supplementary Figure 4-1. The effect of FRT on radiation-induced DNA damage measured by CASP software in thymus tissue of WT mice.

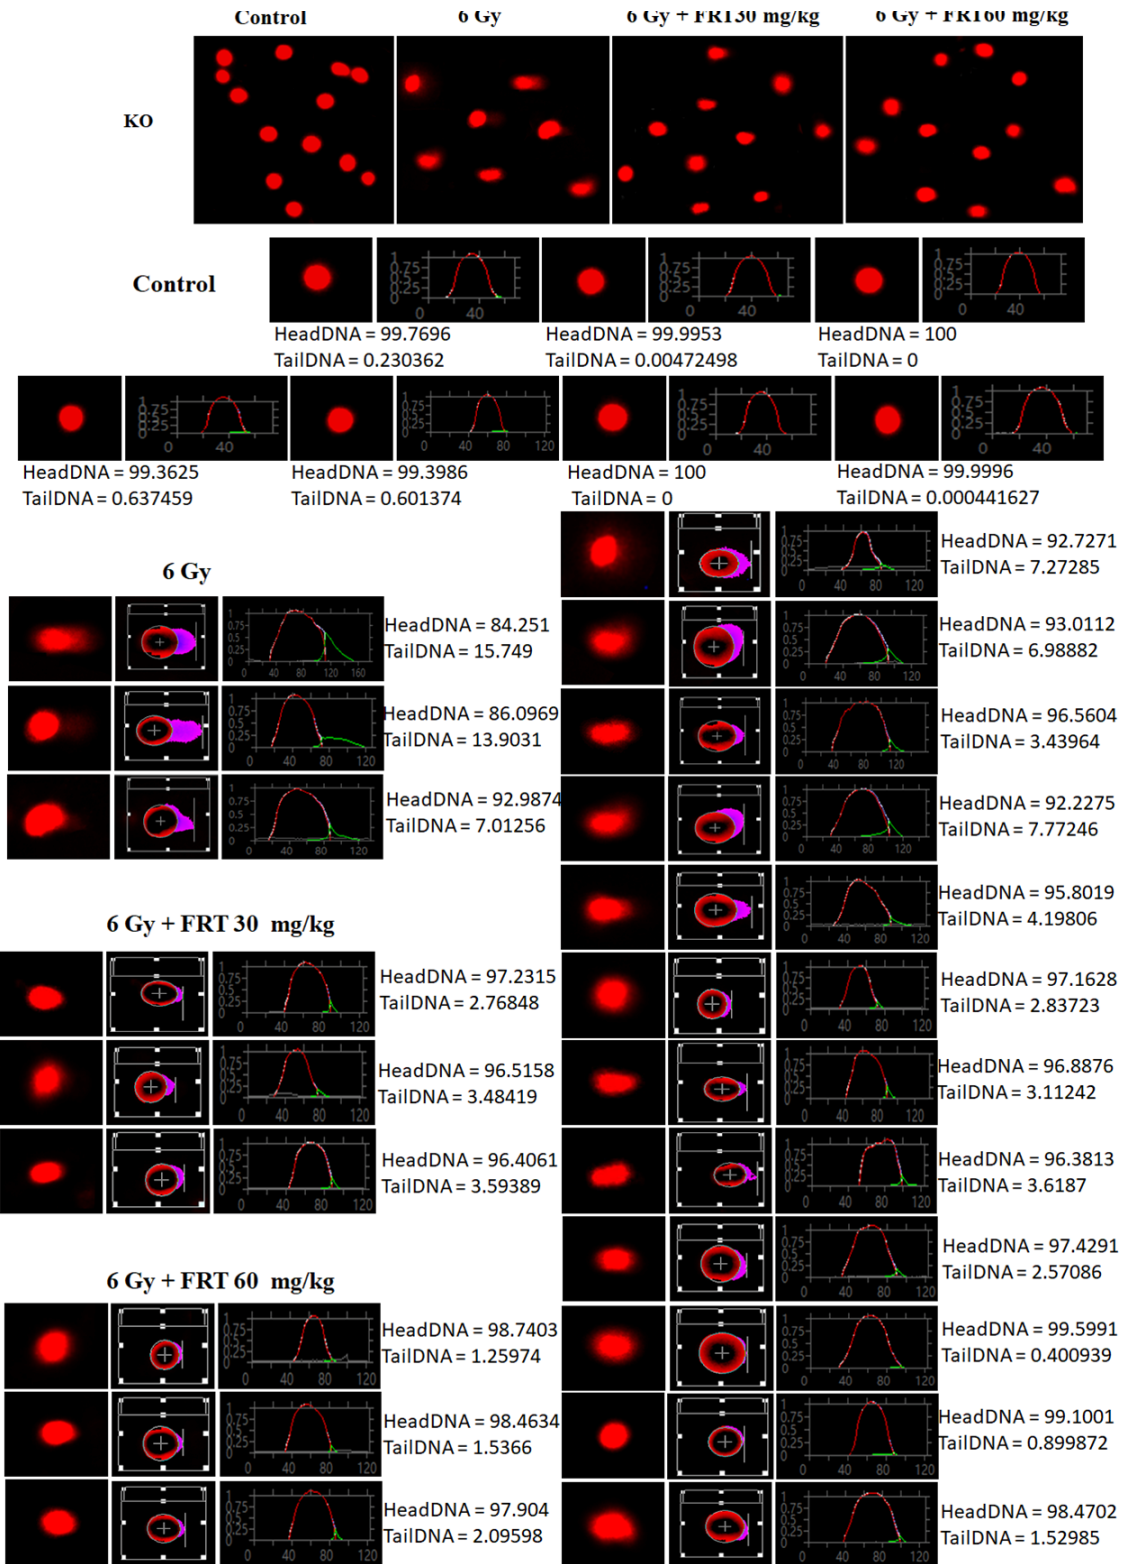

Supplementary Figure 4-2. The effect of FRT on radiation-induced DNA damage measured by CASP software in thymus tissue of KO mice.

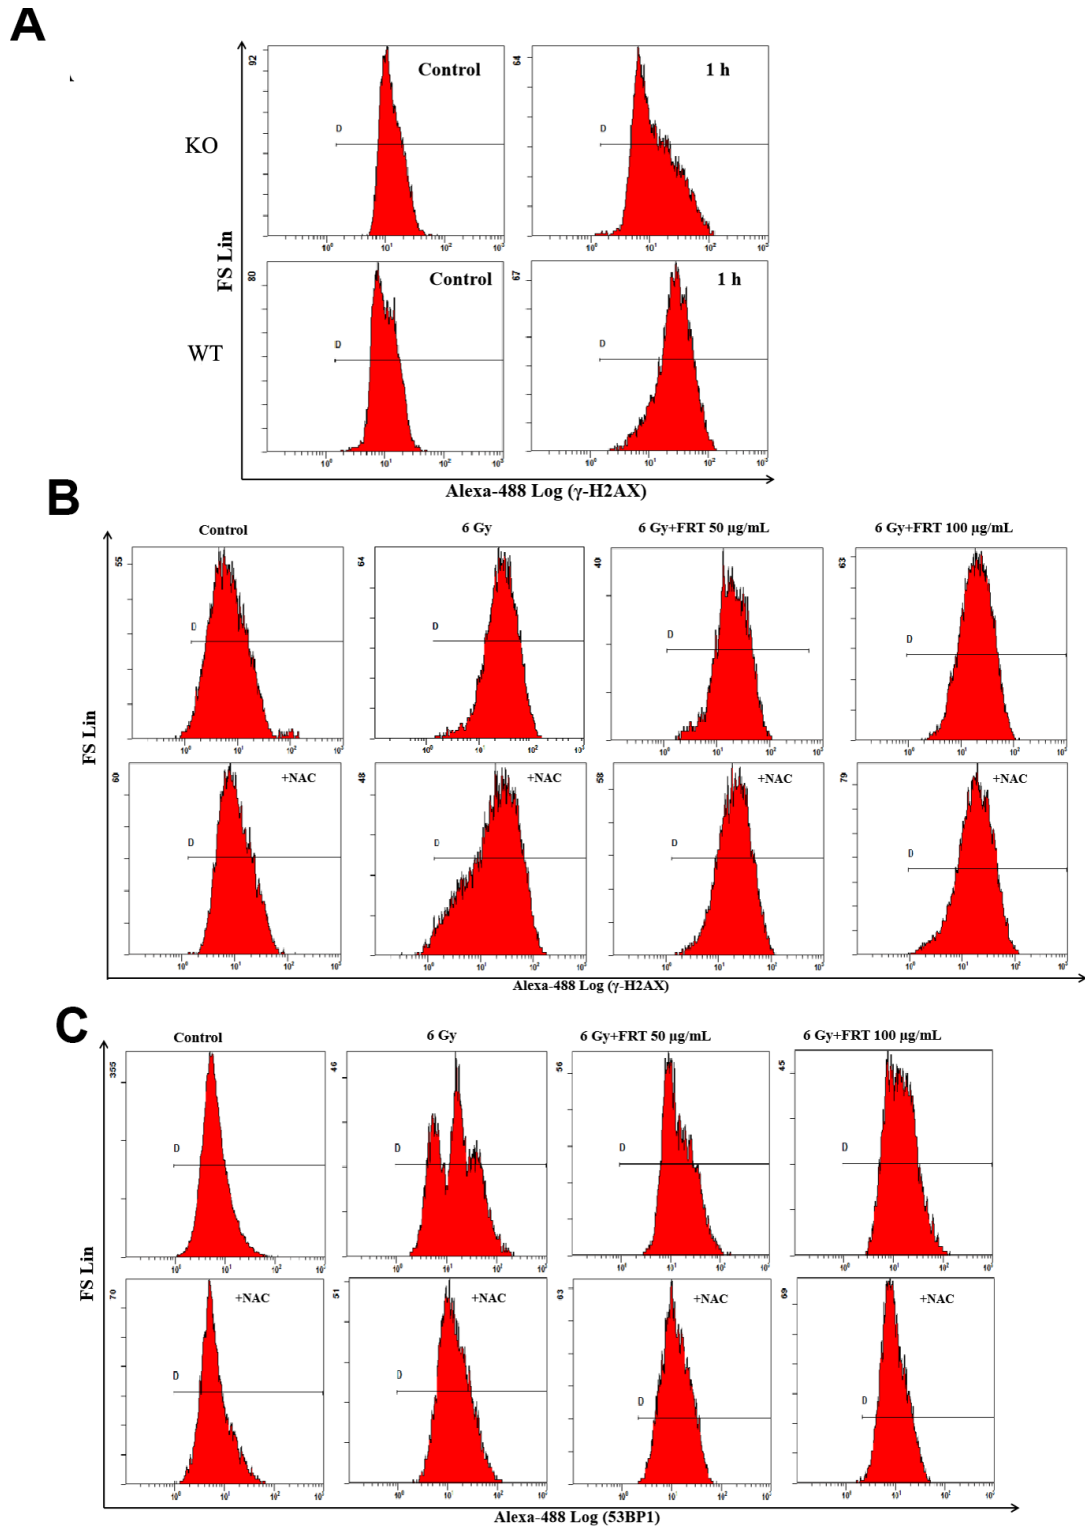

**Supplementary Figure 4-3. Protective effect of FRT on radiation-induced thymus DNA damage.** (A). The thymus from WT and KO mice were harvested and ground into a cell suspension. Intracellular  $\gamma$ -H2AX levels were measured by flow cytometry one hour after 6 Gy irradiation. (B) and (C). Thymus cells from WT mice were divided into eight groups. □ Blank control group; □ Pure radiation group 6 Gy; □ Radiation group + FRT 50  $\mu$ g/mL group; □ Radiation group + FRT 100  $\mu$ g/mL group; □ Control + NAC (0.5 mM); □ 6 Gy + NAC (0.5 mM); □ 6 Gy + FRT 50  $\mu$ g/mL+NAC (0.5 mM); □ 6 Gy + FRT 100  $\mu$ g/mL+NAC (0.5 mM). NAC and FRT were added to cell cultures 2 h before radiation, then collected 1 h after radiation.  $\gamma$ -H2AX and 53BP1 was detected by flow cytometry.
